# Supplementary material for: Cross Sectional Study on the Association between Dental Caries and Life Habits in School Age Italian Children
Source: MDPI journal article supplement (doi:10.3390/healthcare10040607), 2022-03-24
Supplement: s1 [file s1]

## Supplementary Materials

**Table S1.** School questionnaire.

### Child personal information

|                    |  |
|--------------------|--|
| Name               |  |
| Surname            |  |
| Date of birth      |  |
| Sex                |  |
| Place of Residence |  |

### Mother's medical history

|                                                          |                                                                                                                                                                                                                                                                        |
|----------------------------------------------------------|------------------------------------------------------------------------------------------------------------------------------------------------------------------------------------------------------------------------------------------------------------------------|
| Born in Italy                                            | <input type="checkbox"/> yes <input type="checkbox"/> no                                                                                                                                                                                                               |
| Place of Residence                                       |                                                                                                                                                                                                                                                                        |
| Weight                                                   |                                                                                                                                                                                                                                                                        |
| Height                                                   |                                                                                                                                                                                                                                                                        |
| Level of Education                                       | <input type="checkbox"/> no education<br><input type="checkbox"/> primary<br><input type="checkbox"/> secondary<br><input type="checkbox"/> high school graduate<br><input type="checkbox"/> undergraduate<br><input type="checkbox"/> postgraduate (master/doctorate) |
| Do you smoke?                                            | <input type="checkbox"/> yes <input type="checkbox"/> no                                                                                                                                                                                                               |
| If YES, how many cigarettes a day?                       |                                                                                                                                                                                                                                                                        |
| How many times a year do you visit your dentist?         | <input type="checkbox"/> never<br><input type="checkbox"/> one<br><input type="checkbox"/> two<br><input type="checkbox"/> more than two                                                                                                                               |
| Have you ever had dental caries on your permanent teeth? | <input type="checkbox"/> yes <input type="checkbox"/> no                                                                                                                                                                                                               |
| Have you ever extracted your teeth because of caries?    | <input type="checkbox"/> yes <input type="checkbox"/> no                                                                                                                                                                                                               |
| When have you last visited your dentist?                 | <input type="checkbox"/> less than 6 months<br><input type="checkbox"/> more than 6 months<br><input type="checkbox"/> more than a year                                                                                                                                |
| How many times a day do you brush your teeth?            | <input type="checkbox"/> never<br><input type="checkbox"/> one<br><input type="checkbox"/> two<br><input type="checkbox"/> more than two                                                                                                                               |
| Did you take fluoride during pregnancy and/or feeding?   | <input type="checkbox"/> yes <input type="checkbox"/> no                                                                                                                                                                                                               |

#### Father's medical history

|                                                          |                                                                                                                                                                                                                                                                        |
|----------------------------------------------------------|------------------------------------------------------------------------------------------------------------------------------------------------------------------------------------------------------------------------------------------------------------------------|
| Born in Italy                                            | <input type="checkbox"/> yes <input type="checkbox"/> no                                                                                                                                                                                                               |
| Place of Residence                                       |                                                                                                                                                                                                                                                                        |
| Weight                                                   |                                                                                                                                                                                                                                                                        |
| Height                                                   |                                                                                                                                                                                                                                                                        |
| Level of Education                                       | <input type="checkbox"/> no education<br><input type="checkbox"/> primary<br><input type="checkbox"/> secondary<br><input type="checkbox"/> high school graduate<br><input type="checkbox"/> undergraduate<br><input type="checkbox"/> postgraduate (master/doctorate) |
| Do you smoke?                                            | <input type="checkbox"/> yes <input type="checkbox"/> no                                                                                                                                                                                                               |
| If YES, how many cigarettes a day?                       |                                                                                                                                                                                                                                                                        |
| How many times a year do you visit your dentist?         | <input type="checkbox"/> never<br><input type="checkbox"/> one<br><input type="checkbox"/> two<br><input type="checkbox"/> more than two                                                                                                                               |
| Have you ever had dental caries on your permanent teeth? | <input type="checkbox"/> yes <input type="checkbox"/> no                                                                                                                                                                                                               |
| Have you ever extracted your teeth because of caries?    | <input type="checkbox"/> yes <input type="checkbox"/> no                                                                                                                                                                                                               |
| When have you last visited your dentist?                 | <input type="checkbox"/> less than 6 months<br><input type="checkbox"/> more than 6 months<br><input type="checkbox"/> more than a year                                                                                                                                |
| How many times a day do you brush your teeth?            | <input type="checkbox"/> never<br><input type="checkbox"/> one<br><input type="checkbox"/> two<br><input type="checkbox"/> more than two                                                                                                                               |
| How many members are there in your family?               | <input type="checkbox"/> 1 <input type="checkbox"/> 2 <input type="checkbox"/> 3 <input type="checkbox"/> 4 <input type="checkbox"/> 5 <input type="checkbox"/> >5                                                                                                     |

#### Child's medical history

|                                    |                                                                              |
|------------------------------------|------------------------------------------------------------------------------|
| Was he/she delivered at term?      | <input type="checkbox"/> yes <input type="checkbox"/> no                     |
| Was he/she breastfed?              | <input type="checkbox"/> yes <input type="checkbox"/> no<br>How many months? |
| Was he/she fed with formula?       | <input type="checkbox"/> yes <input type="checkbox"/> no<br>How many months? |
| Has the child ever taken fluoride? | <input type="checkbox"/> yes <input type="checkbox"/> no                     |

|                                                                                                        |                                                                                                                                                                    |
|--------------------------------------------------------------------------------------------------------|--------------------------------------------------------------------------------------------------------------------------------------------------------------------|
| If YES, up to what age?                                                                                |                                                                                                                                                                    |
| Have you ever been informed about your child's oral hygiene?                                           | <input type="checkbox"/> yes <input type="checkbox"/> no                                                                                                           |
| How many times a day do you think you should brush your teeth?                                         | <input type="checkbox"/> 1 <input type="checkbox"/> 2 <input type="checkbox"/> 3 <input type="checkbox"/> >3                                                       |
| How many times a day does your child actually brush his/her teeth?                                     | <input type="checkbox"/> 1 <input type="checkbox"/> 2 <input type="checkbox"/> 3 <input type="checkbox"/> >3                                                       |
| Does he/she use a toothpaste with fluoride?                                                            | <input type="checkbox"/> yes <input type="checkbox"/> no                                                                                                           |
| Does he/she use dental floss?                                                                          | <input type="checkbox"/> yes <input type="checkbox"/> no                                                                                                           |
| Does he/she use an electric toothbrush?                                                                | <input type="checkbox"/> yes <input type="checkbox"/> no                                                                                                           |
| Did he/she use a pacifier?                                                                             | <input type="checkbox"/> yes <input type="checkbox"/> no                                                                                                           |
| If YES, up to what age?                                                                                |                                                                                                                                                                    |
| Do/did you usually put your child's pacifier in your mouth?                                            | <input type="checkbox"/> yes <input type="checkbox"/> no                                                                                                           |
| Do/did you usually drink from your child's same bottle and/or glass?                                   | <input type="checkbox"/> yes <input type="checkbox"/> no                                                                                                           |
| Do/did you usually use a honeyed pacifier for your child?                                              | <input type="checkbox"/> yes <input type="checkbox"/> no                                                                                                           |
| Does/did your child usually drink or suck something else other than water before sleeping?             | <input type="checkbox"/> yes <input type="checkbox"/> no                                                                                                           |
| Does/did your child use diuretics, mucolytics, cough suppressants, bronchodilators, sprays for asthma? | <input type="checkbox"/> yes <input type="checkbox"/> no                                                                                                           |
| Does your child often stay with his/her mouth open?                                                    | <input type="checkbox"/> yes <input type="checkbox"/> no                                                                                                           |
| Does your child suffer from allergies?                                                                 | <input type="checkbox"/> yes <input type="checkbox"/> no                                                                                                           |
| If YES, to what?                                                                                       |                                                                                                                                                                    |
| How many times a day does your child eat?                                                              | <input type="checkbox"/> 1 <input type="checkbox"/> 2 <input type="checkbox"/> 3 <input type="checkbox"/> 4 <input type="checkbox"/> 5 <input type="checkbox"/> >5 |
| Does he/she eat at night?                                                                              | <input type="checkbox"/> yes <input type="checkbox"/> no                                                                                                           |
| When was his/her last dental visit?                                                                    | <input type="checkbox"/> less than 6 months<br><input type="checkbox"/> more than 6 months<br><input type="checkbox"/> more than a year                            |

**Table S2.** Dental clinical record.

|                            |     |                |  |
|----------------------------|-----|----------------|--|
| Patient's Name and Surname |     | Date of Birth: |  |
| DENTAL GENERAL INFORMATION |     |                |  |
| SEX                        | F   | M              |  |
| AGE                        |     | Years, months  |  |
| WEIGHT                     |     | Kg             |  |
| HEIGHT                     |     | cm             |  |
| PRESENCE OF CARIES         | YES | NO             |  |
| NUMBER OF DECAYED TEETH    |     |                |  |
